# Supplementary material for: Chitin-based barrier immunity and its loss predated mucus-colonization by indigenous gut microbiota
Source: PubMed Central journal article supplement (PMC6109156; doi:10.1038/s41467-018-05884-0), 2018-08-24
Supplement: 41467_2018_5884_MOESM1_ESM.pdf [file 41467_2018_5884_MOESM1_ESM.pdf]

## **Supplementary Information**

### **Chitin-based barrier immunity and its loss predated the mucus-colonization by indigenous gut microbiota**

Nakashima *et al.*

Supplementary Figures 1-6.

Supplementary Tables 1-3.

Supplementary References.

|                   |                            | Gill slits | Endostyle | Pulley cartilage | Jaw |    |
|-------------------|----------------------------|------------|-----------|------------------|-----|----|
| Animals           | Others                     | No         | No        | No               | No  |    |
|                   | Deuterostomes              |            |           |                  |     |    |
| Chordates         | Hemichordates /Echinoderms | Yes*       | No        | No               | No  |    |
|                   | Lancelets                  | Yes        | Yes       | No               | No  |    |
|                   | Tunicates                  | Yes        | Yes       | No               | No  |    |
|                   | Vertebrates                | Lampreys   | Yes       | Yes**            | Yes | No |
|                   |                            | Hagfish    | Yes       | No               | Yes | No |
| Jawed vertebrates |                            | Yes        | No        | No               | Yes |    |

**Supplementary Figure 1. Diversification of food habit in chordates accompanied morphological innovations in the pharyngeal region.** The left diagram shows relationships of chordates in animal phylogeny. Chordates belong to deuterostomes. Non-deuterostome animals (*e.g.* protostomes, cnidarians and sponges) are collectively shown as others. The right panel shows the presence or absence of four pharyngeal anatomical features in each group. The most prominent and oldest food habit in marine environments is suspension-feeding, which captures particulate organic matter in seawater using various mechanisms particular to each animal group<sup>1</sup>. Gill slits are a deuterostome innovation that enables internal water flow through the pharynx<sup>2</sup>. Internal water flow, produced by cilia surrounding gill slits, is functionally important for mucociliary deposit-feeding in enteropneust hemichordates<sup>3</sup>. Gill slits were lost secondarily in pterobranch hemichordates and echinoderms that show diverse food habits\*. The endostyle, or the longitudinal glandular groove on the ventral wall of the pharynx, is a chordate innovation that secretes unique mucus nets for high-efficiency filtration of internal water flow<sup>4,5</sup>. This internal filter-feeding using mucus nets occurs in two invertebrate chordates, lancelets and tunicates (highlighted in yellow). In the jawless vertebrate lampreys, the endostyle persists only in larval forms\*\* and no longer secretes mucus nets. The lamprey endostyle transforms during metamorphosis to the follicular thyroid of adult forms. Concomitantly, larval suspension-feeding using mucus cords, which are produced by goblet cells, shifts to adult blood/flesh-feeding<sup>6</sup>. The other jawless vertebrates, hagfish, which lack a larval stage, are predators that prey upon various invertebrates, but are opportunistic scavengers on animal remains<sup>7</sup>. Despite different food habits, adult lampreys and hagfish share a common feeding mechanism using pulley movements of lingual cartilage, a vertebrate innovation<sup>8,9</sup> (highlighted in red). In jawed vertebrates, subsequent morphological innovations in the pharynx (*e.g.* jaw, tongue and dentition), together with those in the digestive tract (*e.g.* acidic stomach, rumen and cecum) are relevant to diversification of food habits including herbivory<sup>10</sup> (highlighted in blue).

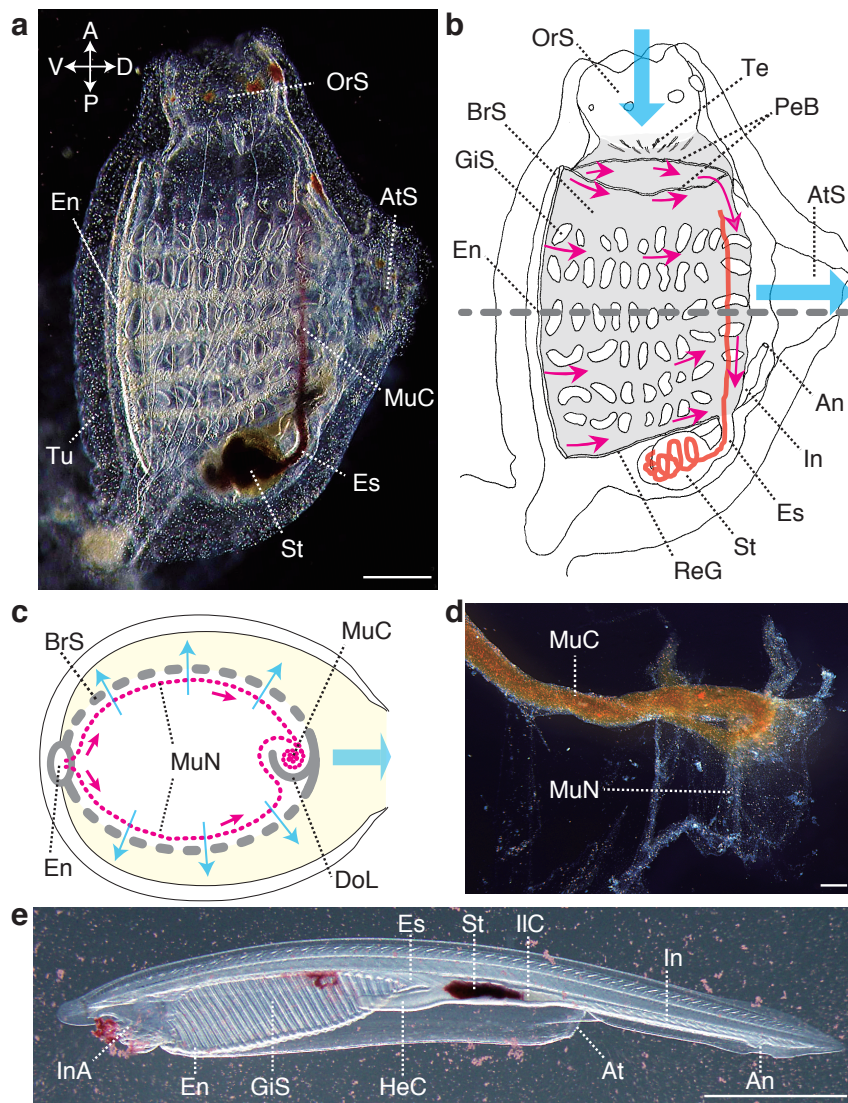

**Supplementary Figure 2. Internal filter-feeding using mucus nets of invertebrate chordates.**

(a-c) The feeding mechanism of the tunicate *Ciona intestinalis* Type A (a, body image; b, anatomy; c, horizontal section at the dotted line in b). A cross indicates the body axes: A, anterior; P, posterior; D, dorsal; V, ventral. The largest organ of the body is the branchial sac (BrS, gray shaded in b), an enlarged pharynx perforated with ciliated gill slits (GiS). Coordinated movements of these cilia generate mechanical force to draw seawater from the oral siphon (OrS) into the branchial sac (a vertical cyan arrow in b). Seawater passes through the gill slits (radial cyan arrows in c) to enter the atrial space (highlighted in yellow in c) and is expelled from the atrial siphon (AtS) (horizontal cyan arrows in b and c). Particulate matter in seawater is trapped with two sheets of mucus net (MuN) that cover the left and right branchial walls (magenta dotted lines in c). Mucus nets are secreted from the glandular endostyle (En) on the ventral branchial wall<sup>11</sup> and conveyed dorsally by ciliary actions of the peripharyngeal bands (PeB), the retropharyngeal groove (ReG), and the internal surface of the branchial sac (horizontal magenta arrows in b). At the dorsal lamina (DoL), mucus nets are rolled up as a single mucus cord (MuC), which is then transported posteriorly to the esophagus (Es) and the stomach (St), where the cord often coils until it enters the intestine (In) (vertical magenta arrows in b). The mucus cord is recognizable due to trapped red beads. The intestine turns anterior-dorsally, and the anus (An) opens near the atrial siphon, from which feces are expelled into the excurrent water. For feeding operations, see Supplementary Movie 1. Te, tentacles; Tu, tunic. (d) A terminus of mucus cord (MuC) partially unfolded to mucus nets (MuN) with trapped red beads. (e) The lancelet *Branchiostoma floridae* is an internal filter-feeder using mucus nets<sup>12</sup>. For operations, see Supplementary Movie 2. InA, inhalant aperture; HeC, hepatic cecum; IIC, ilio-colon; At, atripore. Scale bars (a,d), 100  $\mu\text{m}$  and (e), 200  $\mu\text{m}$ .

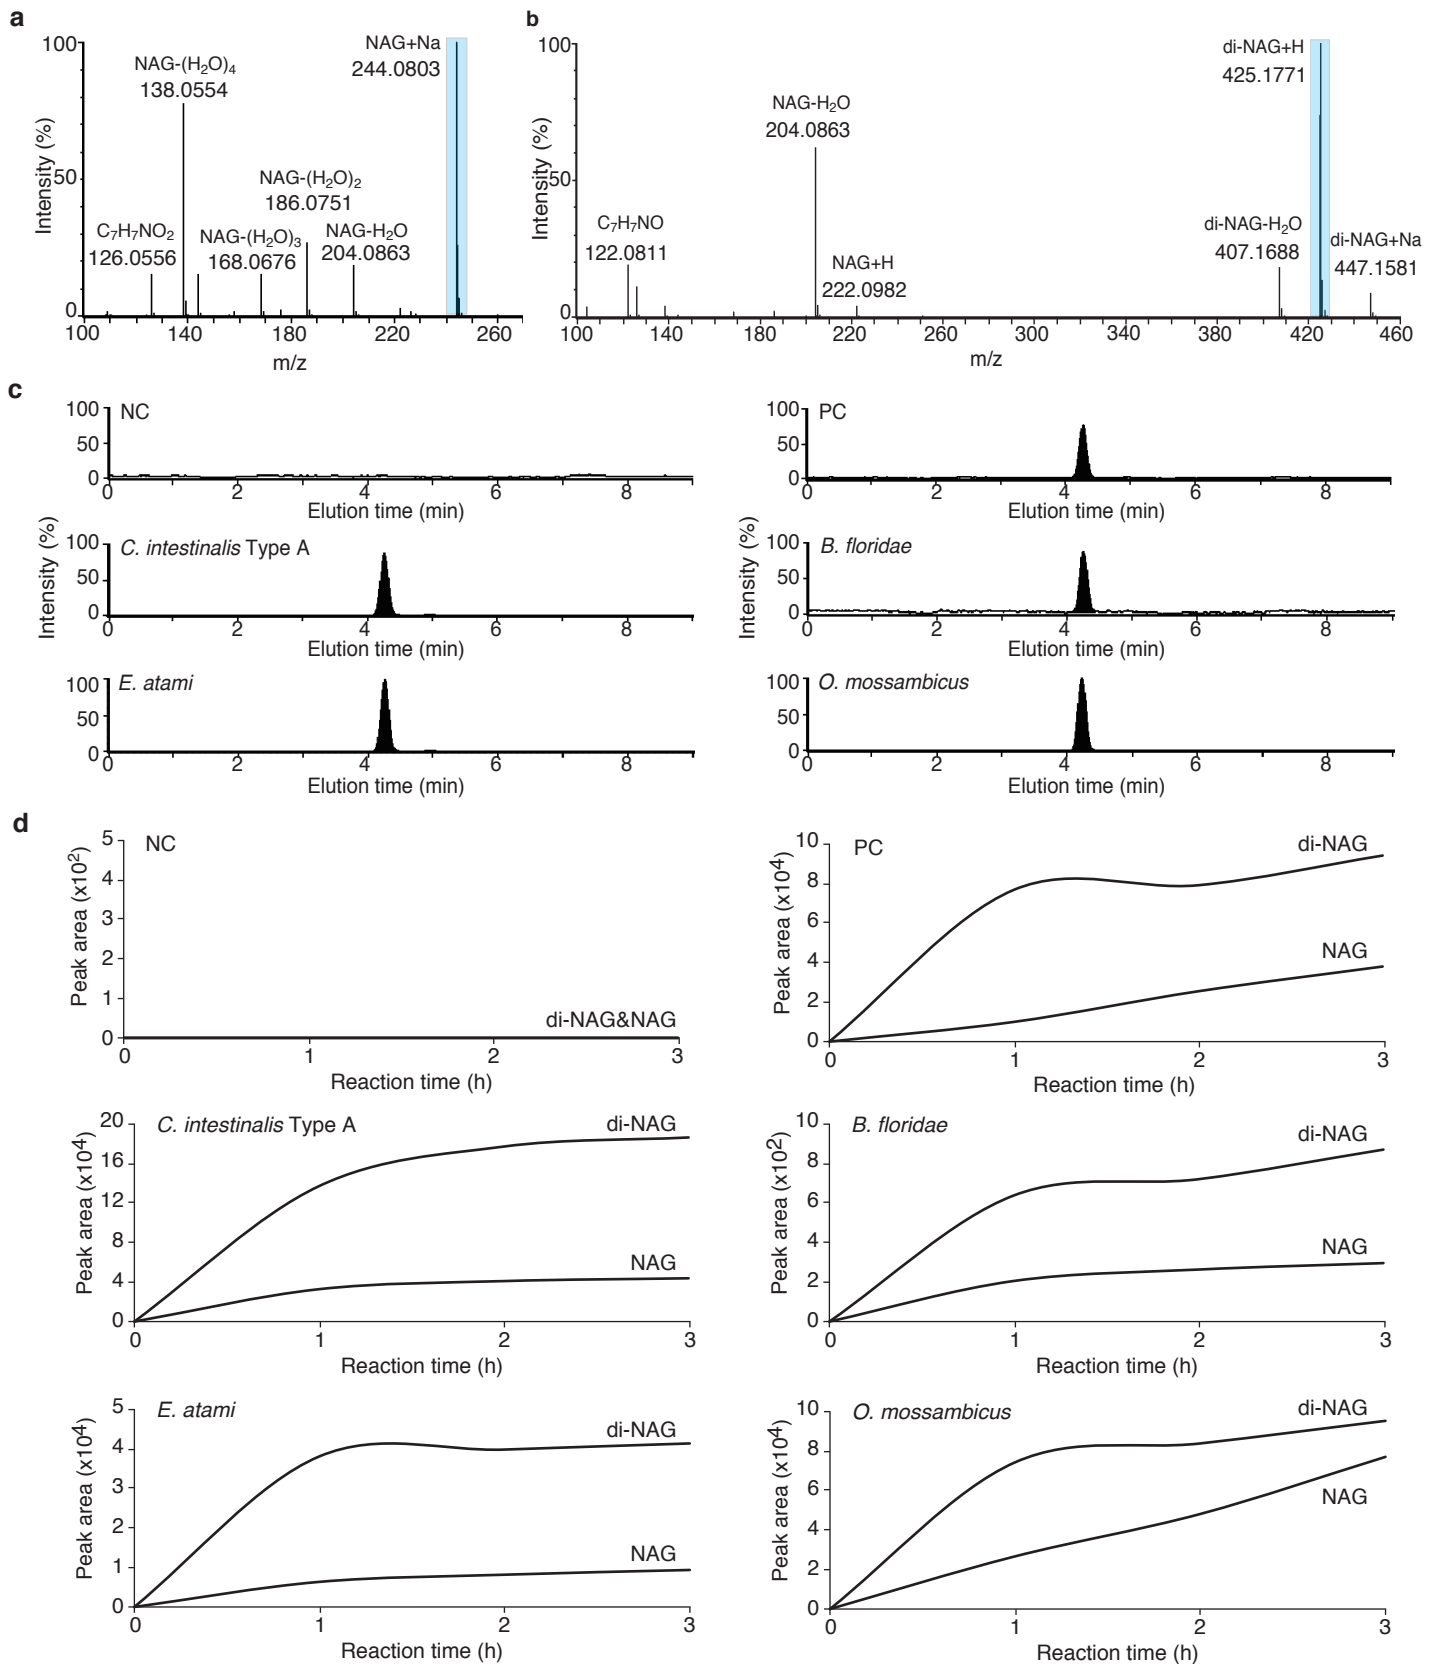

**Supplementary Figure 3. Mass spectrometric analysis of chitinase products of intestinal barrier membranes. (a-b)** LC-MS spectra of N-acetylglucosamine (NAG) and N-acetylchitobiose (di-NAG) standards. NAG+Na (m/z 244.0083) and di-NAG+H (m/z 425.1771) are selected for subsequent quantification (highlighted in blue). **(c)** Extracted ion chromatograms for NAG released from barrier membrane samples by *Pyrococcus furiosus* chitinase. This hyperthermophilic chitinase releases NAG and di-NAG from chitin as the main product<sup>13</sup>. Species names indicate the origin of samples. NC, negative control lacking chitinase in reaction; PC, positive control (chitin standard). **(d)** Time course relative quantification of released NAG and di-NAG. Peak area of extracted ion chromatograms is plotted.



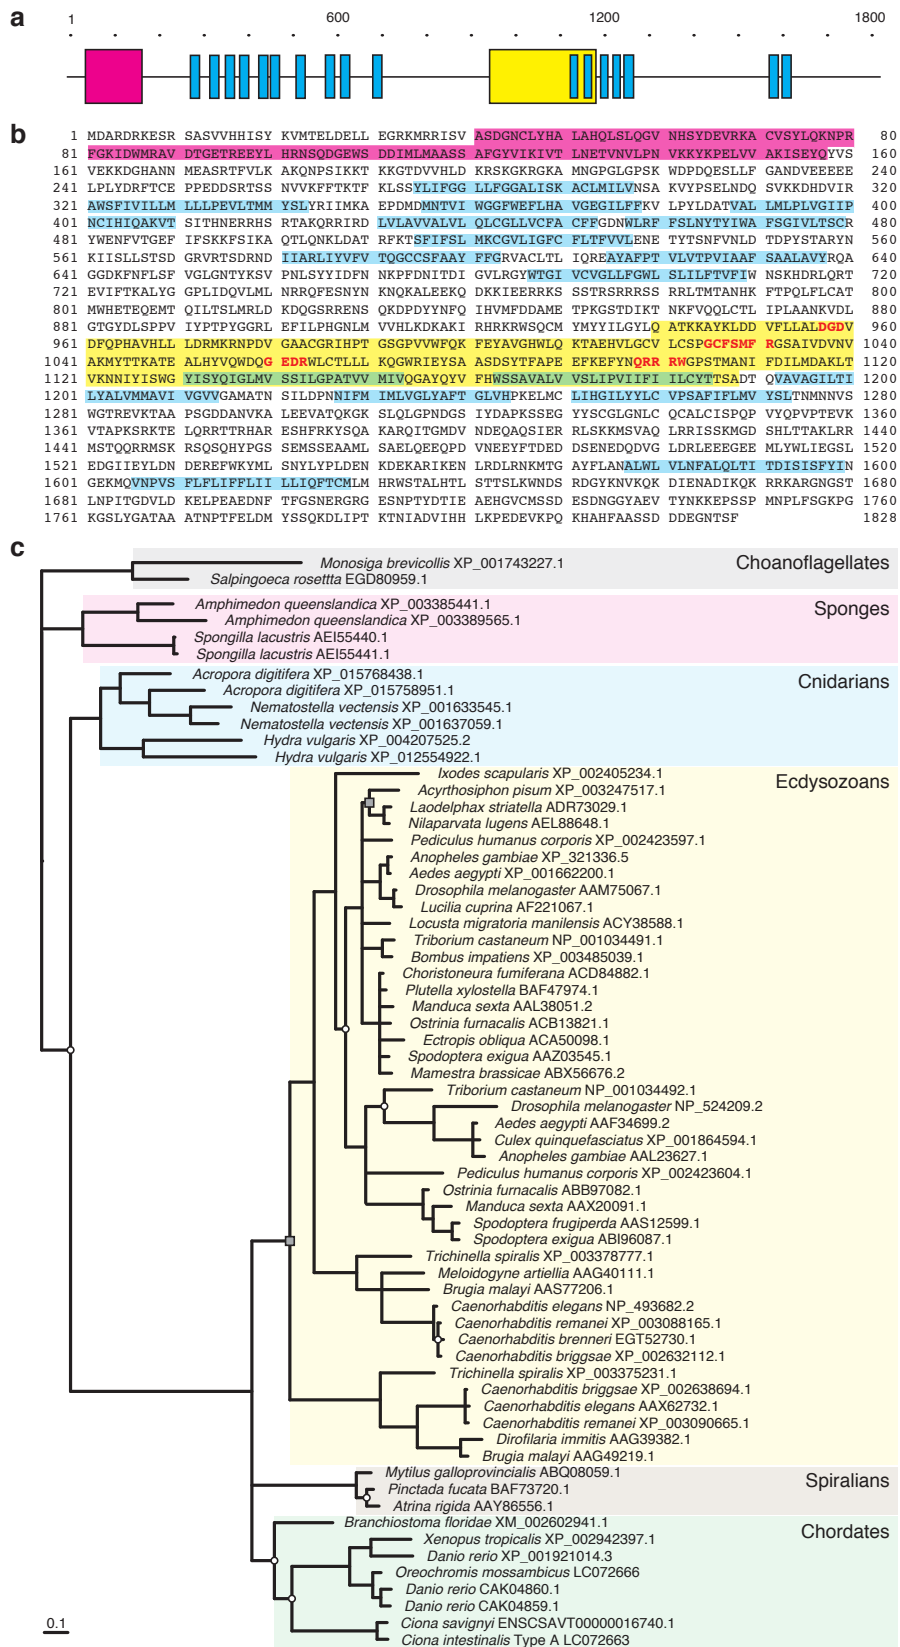

**Supplementary Figure 4. *Ciona* chitin synthase (Ci-CHS).** (a) Domain structure of Ci-CHS. Ci-CHS contains an N-terminal ovarian tumor domain (a magenta box), 17 transmembrane domains (cyan boxes) and a chitin synthase domain (a yellow box). (b) Amino acid sequence of Ci-CHS (1,828 amino acid residues). Numerals on the left and right sides of the sequence denote the number of amino acids from the putative translation-initiating methionine. Regions corresponding to the domains are shown by coloring as in a. Motif sequences of chitin synthases are typed in red. (c) Bayesian inference topology of animal chitin synthases. Species names are followed by accession codes to Genbank or Ensembl. Choanoflagellate sequences are used as outgroups. Plain nodes, gray rectangles and white circles denote posterior probabilities of 1.0, >0.95 or >0.9, respectively.

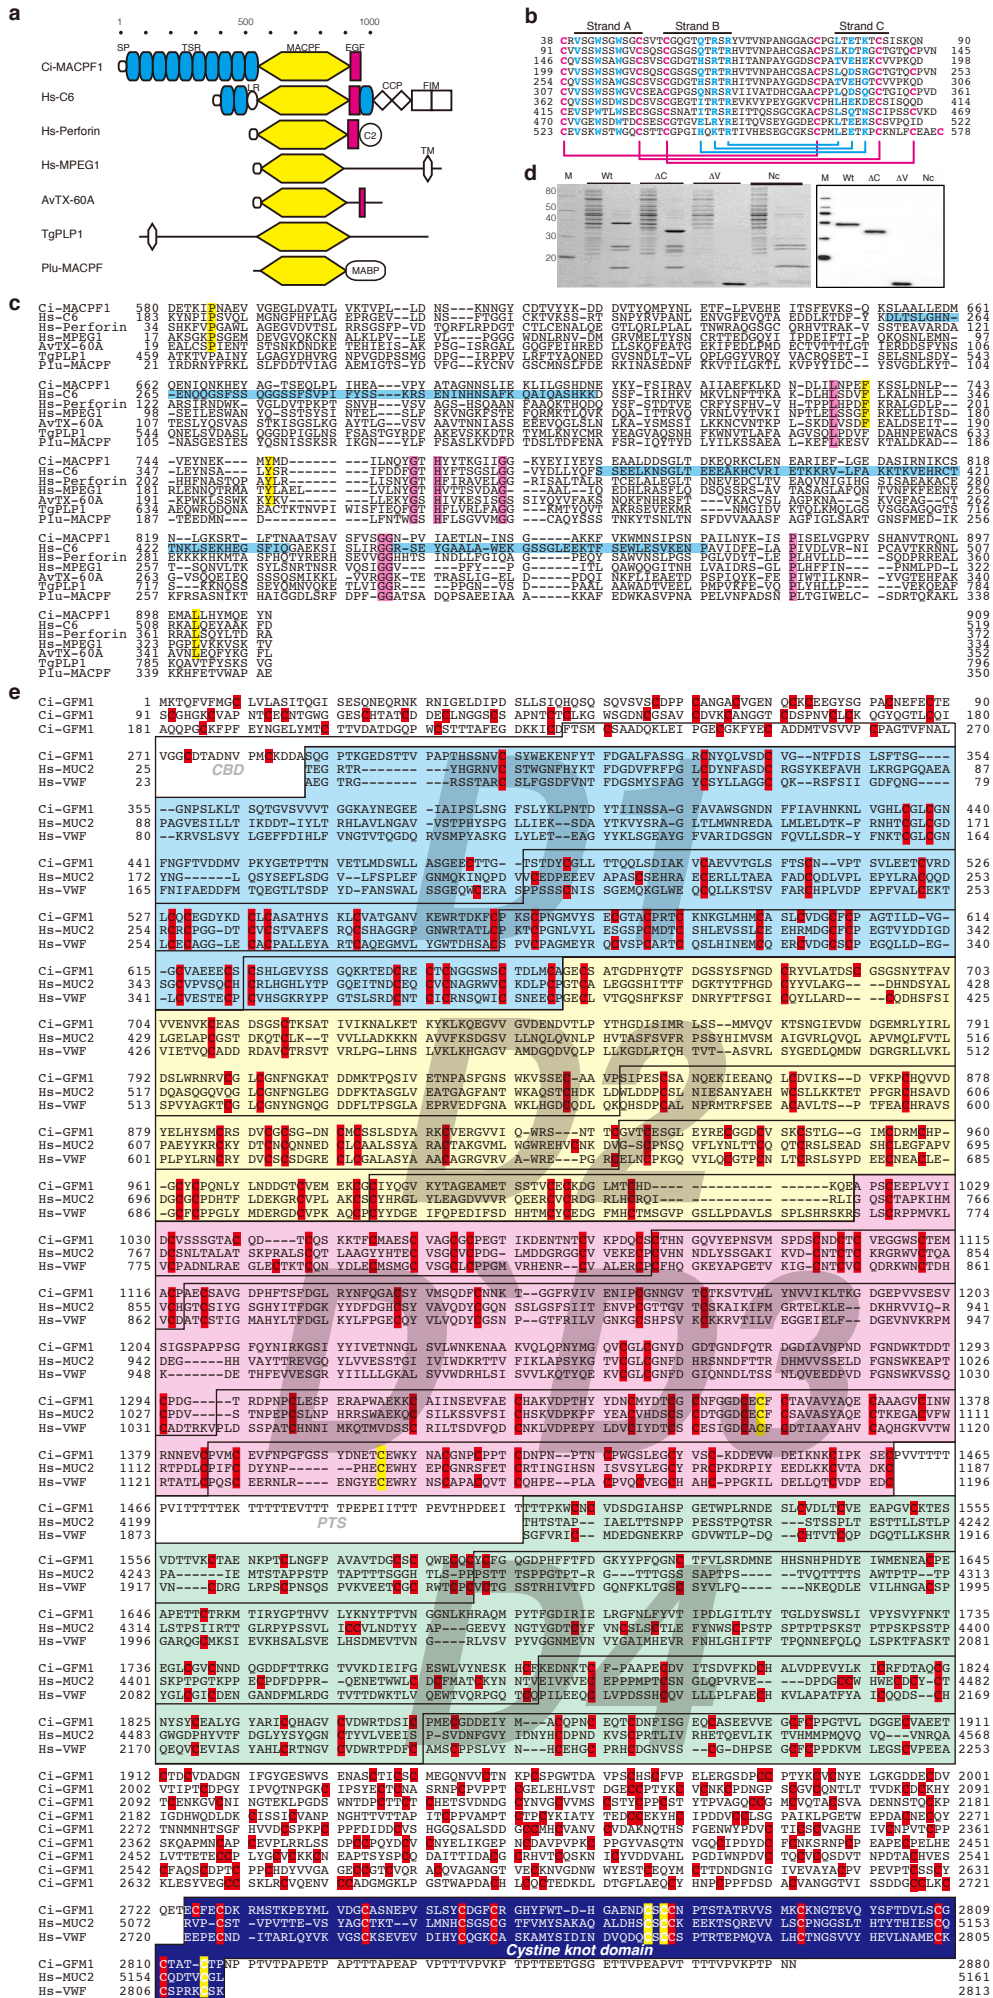

**Supplementary Figure 5. Protein components of *Ciona* barrier membranes.** (a) Domain structure of Ci-MACPF1. MACPF domains (yellow) are essential for cytolytic activities in different biological contexts<sup>14</sup>. Hs-C6, human complement factor 6; Hs-Perforin, human perforin; Hs-MPEG1, the common ancestor of C6 and perforin; AvTX-60A, a nematocyst toxin of the sea anemone *Actinaria villosa*; TgPLP1, an egression and virulence factor of the apicomplexan malaria pathogen *Toxoplasma gondii* and Plu-MACPF, a bacterial MACPF of *Photorhabdus luminescens*. SP, signal peptide; TSR, thrombospondin type 1 repeats (cyan); EGF, epidermal growth factor-like domain (magenta); CCP, complement control protein domain; FIM, factor I/membrane attack complex domain; C2, Ca<sup>2+</sup> dependent membrane-targeting domain and MABP, multi-vesicular body 12-associated beta-prism domain. (b) Alignment of 10 TSRs of Ci-MACPF1. TSRs form three-stranded folds stabilized by inter-strand interactions<sup>15</sup>. Lines below sequences denote predicted interactions between conserved residues (cyan) and cysteines (magenta). The predicted disulfide bonds follow the pattern of TSR subgroup 2, which binds to extracellular glycosaminoglycans. (c) Alignment of MACPF domains. Sequence ID follows a. Conserved residues for all or animal sequences are highlighted in red or yellow, respectively. Despite this low level of similarity, a common folding pattern and conformational changes underlying cytolytic functions are conserved between the human and bacterial sequences<sup>14</sup>. Blue regions correspond to clusters of helices in Hs-C6 that insert into the cellular lipid bilayer. (d) Heterologous expression of VCBP-C in *E. coli* (left panel, silver stain; right panel, Western blot). Wt, ΔC, ΔV and Nc (negative control) consist of two lanes: left, cell lysate and right, purified protein. M, marker. (e) Conservation of cysteine residues in Ci-GFM1, human MUC2 (Hs-MUC2) and human VWF (Hs-VWF). Alignments are made for D1 (cyan), D2 (yellow), D'D3 (magenta), D4 (green) and CK (blue) with corresponding regions of Hs-MUC2 and Hs-VWF. Domains in each assembly are boxed. Cysteines are highlighted in red. Of the 157 cysteines of Ci-GFM1 in the aligned regions, 151 are conserved with at least one of the human sequences. The 5 cysteines that form intermolecular disulfide bonds in Hs-MUC2 and Hs-VWF are conserved in Ci-GFM1 (highlighted in yellow).

|          |            |      |             |             |             |             |             |             |             |             |              |      |
|----------|------------|------|-------------|-------------|-------------|-------------|-------------|-------------|-------------|-------------|--------------|------|
| <b>a</b> | BRAF168947 | 1    | MATRRRRNAKD | IEITLTKRGE  | DYKKKVEAVK  | TKEKAPKWP   | GACKLLLSIV  | LFLVLIISCLG | FGKVSVSTG   | QCLAQARFEN  | RTYTPPSHNI   | 90   |
|          | BRAF118918 | 1    | -----MED    | LRERGGKRE   | RHRDFTWDFPQ | LNPAGAEEK   | KRRCFOLAQH  | LVAVLG-LA   | VLAALAAVAKG | SLGLVLSFLS- | -----SPMSR-- | 76   |
|          | BRAF168947 | 91   | TIVQSCDEQV  | PEPIINMILL  | ILMVPYGITL  | LRCLWVTGCR  | GVYPWPTWTA  | IGVGLLASTA  | EVFALGLFML  | EALTTVKVAL  | GILLMNSIYA   | 180  |
|          | BRAF118918 | 77   | ---RSPKPEQ  | ---FYMMLLMF | CLVFPENLWF  | LKSLWRCSFK  | SFVP-PKMKI  | MGFICLIEVL  | VSLSGTVLVL  | VVMPQFDVLT  | NLFISGGVCI   | 160  |
|          | BRAF168947 | 181  | MOIFPQLYE   | CYKFKVRPHK  | GERPPSKWLF  | LTFLADCLG   | IAAFVTIVYE  | SSMEGNDPDG  | WNKV-PLCVL  | LISTAMSEY   | QKLTQTRFNS   | 269  |
|          | BRAF118918 | 161  | VSAIMQIIFR  | -----QRDNW  | KIVFPICSLI  | LTSIGVCMLG  | IDYYVRVTSY  | VDRQSGDCYI  | YVALGIFBSL  | LVLSLWCMNS  | LQATNRMQDT   | 246  |
|          | BRAF168947 | 270  | GTKDAESSRI  | NTEKQHPNED  | EDDVMDISKR  | KDGRLLTSSLI | TSFWKLLLTP  | AVVT-LYWLW  | YOIFWLPQGN  | SVFLPEQWML  | SRKTKHSNRK   | 358  |
|          | BRAF118918 | 247  | LS-QLDGFPRD | FVFPVSSILK  | ILVIGAVYLI  | YHKLIKTLTI  | WDFNVLRDGE  | LLKTGLVLEF  | LQAFCSAACH  | WFGVQACKIH  | SVRMSFALPY   | 335  |
|          | BRAF168947 | 359  | QFVRRAKTIR  | NACVVVCSMT  | YHSEEMEQQ   | LLISLRGLAN  | DLQDEANRHF  | ESHIPFDGDC  | KQGQSPRWAL  | QLMALIDKT-  | MCPP-GEVT-   | 445  |
|          | BRAF118918 | 336  | CCTGPAMLLL  | GIVLFFTLGW  | KLDNGTKSES  | -IIEFCDKLL  | VLN-TKNTSV  | VLELTRSMC   | RTSLNSHYFO  | -----ARLN-  | SPY-GWTA     | 19   |
|          | BRAF168947 | 446  | IFNGL--SCE  | KWETPYGLQF  | CWTFVGARKMS | FNVHLKDNSK  | VRAKRRWSQV  | MYSVVLVDYL  | AN--YNPLGM  | SSGAILDDDI  | EASSPKSTFS   | 531  |
|          | BRAF118918 | 20   | SFD--DSO    | -----PY-IOV | ---DLGETKMV | TGVVTOGK-P  | --GEDQVVR-  | ---SVTIOYO  | -----GO     | DVGSI-----  | --S-RLGGT    | 74   |
|          | BRAF118918 | 424  | TYVYWKIRQV  | RIERTSOLFV  | RRLYESAFID  | LSLLLNTKMK  | VPKARTQESH  | DEMOKCVIYL  | CATMWHETD   | EMLKILTSMF  | RLDYRGGDPK   | 513  |
|          | BRAF168947 | 532  | -TFERSGPHR  | ARLNGSSCWT  | AEDDGLQIYE  | GHPHADEVVK  | SFEIRYLDKS  | TARSGATTAL  | GDGA-WRRYR  | EGPDDGVKTF  | NITPTSGNDA   | 619  |
|          | BRAF118918 | 75   | -SVK-----   | ---WD       | TDDDNKRLV   | NS--VNDLIH  | VVIEYVRVFT  | NKEPDDVSI   | ETPYGGRMLF  | WPEGNMLVH   | HLKDKLLIR-   | 601  |
|          | BRAF168947 | 620  | VRVLEEPDIE  | TRVLR-----  | IY-----PL   | QS--NGSCSM  | RFE---ILG   | HIIADN----  | L--ENTYLLV  | TDADVKFTE   | AAKALLDITA   | 686  |
|          | BRAF118918 | 115  | VKHVKKKIC   | TRVLR-----  | IC-----PT   | PGDWHNACSM  | RFE---ILG   | YNFEDK----  | L--DNTYLLV  | TDADVKFTE   | AAKALLDITA   | 183  |
|          | BRAF118918 | 602  | NKKWSQIMY   | MYVILGWKYG  | VKNPSPKIQO  | LNPSSRAKLV  | SIDSETFVLF  | QYVNDNKRKF  | LSDDNWYLLA  | AVLILVIRL   | AVLILVIRL    | 671  |
|          | BRAF168947 | 687  | RDPAVGAVCA  | RTHPMSGAV   | AWYQIFDYAI  | GHWLNKAANN  | VLGTVLCCPG  | CFSVYRAKAV  | RDG--LAEYS  | THVTKANEFL  | VKDMGEDRWF   | 774  |
|          | BRAF118918 | 184  | RDPAVGAVCA  | RTHPMSGAV   | AWYQIFDYAI  | GHWLNKAANN  | VLGTVLCCPG  | CFSVYRAKAV  | RDG--LAEYS  | THVTKANEFL  | VKDMGEDRWF   | 774  |
|          | BRAF118918 | 692  | MDVNVGAAGC  | WYVQKFEYAV  | GHWLQKTAEH  | GHWLVKTAEH  | VFGSVLCCSPG | CFSLFRGSAL  | MDDHILKYS   | TTAQRAQEVY  | QYDQGEDRWF   | 781  |
|          | BRAF168947 | 775  | CLLLVESGWK  | LEYSAVSDS   | TFCPETDFEF  | FKORRRWLPS  | TVANLVLMIO  | KWKTIVTKMS  | NISRLPIYO   | LLLLLSTLIG  | PGTCMLLISG   | 864  |
|          | BRAF118918 | 272  | CLLM-----   | ---TFDEF    | FKORRRWLPS  | TVANLVLMIO  | KWOTMVKNNN  | NISRLPIYO   | LLLLLSTLIG  | PGTCMLLISG  | PGTCMLLISG   | 340  |
|          | BRAF118918 | 782  | CLLLQQQWR   | VEYNAASDY   | TNSPQFEFEE  | YNORRRWGPS  | TLANTLDLH   | SGPETVKRNE  | SISRIYVYFO  | MPFTVGSILG  | PASVTLMIAS   | 871  |
|          | BRAF168947 | 865  | GMAVAYGVDP  | VISMVLVLT   | SVAFALCLKP  | TNQNVQLOIA  | KILTFAPAVV  | MAAVTVGTAT  | DIARGLSNP-  | ---ASNSTGG  | -DVLLEPTEI   | 950  |
|          | BRAF118918 | 341  | GLNVAYGVSV  | VISMVLVLT   | SVAYAMICLY  | TSQNFQLOMA  | QVLTVFVAIV  | MAAVTVGTAR  | EVVEGLSGPP  | PLPTDAPTD   | PDALVLPVPEV  | 430  |
|          | BRAF118918 | 872  | AFQFVRLTG   | TLISIVACVE  | FVYIILICPL  | TKSNQITIA   | GIMSVLYAPL  | MTASFFSIIG  | DMVQI----   | -----QTLPT  | -----        | 942  |
|          | BRAF168947 | 951  | SFLVFFLIIG  | IFIVTALLHP  | TEFFCLPHGI  | WYLFCLPSGY  | LLLTYSICN   | LINDRSW-AEE | PATE-----   | -E-----     | -R-----P-    | 1016 |
|          | BRAF118918 | 431  | STYFLTIIA   | IFIVTALLHP  | TEFFCLPHGI  | WYLFCLPSGY  | LLLTYSICN   | LINDRSWGTRE | GHTVYSGKSM  | TEWVSVFVA   | MRRCCMGHT    | 520  |
|          | BRAF118918 | 943  | TGLLISMAI   | MYLITALLHP  | EFFLLIYGL   | MYFICIPSGY  | LLLTYSILVN  | MNNVSWGTR   | TNKGVE---   | -QKKLHNLIC  | DKTRCCECD    | 1028 |
|          | BRAF168947 | 1017 | ---QSPPALP  | PKTLPPPLPK  | RR---RKVFT  | DPNDS---LP  | DEP---VMG   | AVARAT--MT  | QKRFRFRNRK  | ESLARARRSK  | HSNWRMSYD    | 1091 |
|          | BRAF118918 | 1029 | QVEDONAAE   | IQSEPTPTQ   | AKFPPTPLVE  | DPAAEEEEEAA | DKPKRKGKGF  | AVAFSIGQLG  | RRGWFKPRTG  | QSMARRRATK  | QSAWRSSLD    | 610  |
|          | BRAF118918 | 1092 | MKIQVQTEE   | RLIFQOALGQ  | IT---QHIFV  | NAITQ---N   | ETP---LHP   | ALMLEP--HT  | RQDTKKEAK   | EEVERPLVDD  | LKRNAKSSD    | 1105 |
|          | BRAF168947 | 1029 | TRDVGVEWML  | PKMKREKYAQ  | KFLDHGYDDT  | SFIAGKMSD   | LEFIFGVDKM  | RPEILLRIDK  | LSEVAIDVKY  | PDVVEWLDK   | ILGLEOYNDK   | 1181 |
|          | BRAF118918 | 611  | TKDKLSTAMWL | PAEFPKDRYLN | SFLQHGYYDT  | TFIAGMSDDG  | LEFIFGVTKIH | RPALLREIDK  | LSEYQDILK   | PETVEWLDK   | ILGLEOYNDK   | 789  |
|          | BRAF118918 | 1106 | LGSSSSDGA   | ENKSMSSDDE  | EDSDHHDHDD  | YMR-----    | AEIPAADVWH  | -PVKEEFLK   | LYTFYRILRN  | QEQIRYALRN  | KDYDEVEDL    | 1189 |
|          | BRAF168947 | 1182 | VYDVAVASL   | VNLEEQQIRE  | NLGIIVKTAHV | KRMLVAISHL  | RHPSETDEMI  | DRVKKVISDN  | VKSRMQLDLD  | EEHVKYREYK  | FWNVRVDAAL   | 1271 |
|          | BRAF118918 | 701  | VYEGYDVTSL  | VNLEEQQIRE  | NLGIIVKTAHV | KRMLVAISHL  | RHPSELDEMI  | DRVKKVVS-K  | LTTQRMENV   | QDHYRYRENK  | FWAKLRNCKI   | 789  |
|          | BRAF118918 | 1190 | WLM---LDP   | LNWLVSVGK   | E-DVLSQYQL  | EFLQALARNV  | ARQTLKTRM   | EKLERVK-L   | ATEKTLAAR   | VQLEENBND   | FWNLIERL     | 1274 |
|          | BRAF168947 | 1272 | KODYGVFNNN  | WGLKEQLVEL  | RNSWLLVLEF  | SNALWLTLLI  | TLASQAN--L  | OLKRSNIFSS  | ---SNKVDL   | NPLGLVLELV  | FGFILLIQFL   | 1356 |
|          | BRAF118918 | 790  | KODYGVFNNN  | WGLKEQLVEL  | RNSWLLVLEF  | SNALWLTLLI  | TLAQAN--L   | OLKRSNIFSS  | ---SNKVDL   | NPLGLVLELV  | FGFILLIQFL   | 1356 |
|          | BRAF118918 | 1275 | KPIHSHKHO   | EYVNRLEKSL  | RKAVFLYFPI  | INVLWVATF   | FLOAIGNDVI  | SIKIPKYFEN  | GTKSDEFLEG  | EPFLTMLPLS  | FAVLLIQVEL   | 1364 |
|          | BRAF168947 | 1357 | AMLVHRVAVT  | VHMLARIRNL  | WEKLTDEDTV  | GQKG-QOAG-  | T-TSRIPDAM  | PATSRRGFD   | AIYQNAEFG   | DGENPPVYS   | VSSF         | 1437 |
|          | BRAF118918 | 863  | AMLVHRVAVT  | MHLLARVYSL  | WORWEDDVTV  | PTPPDGDGFO  | TKTSDVKAKM  | -MTINETAE   | EYVDNPMVET  | DDQ--PVYDD  | PNTL         | 943  |
|          | BRAF118918 | 1365 | AMLVHRVAVT  | HLVVS-TRSS  | EKNYKEKE--  | -EEDTGDGHG  | IMENPAHNEI  | FLTTLED-    | -----       | -----       | -----        | 1417 |

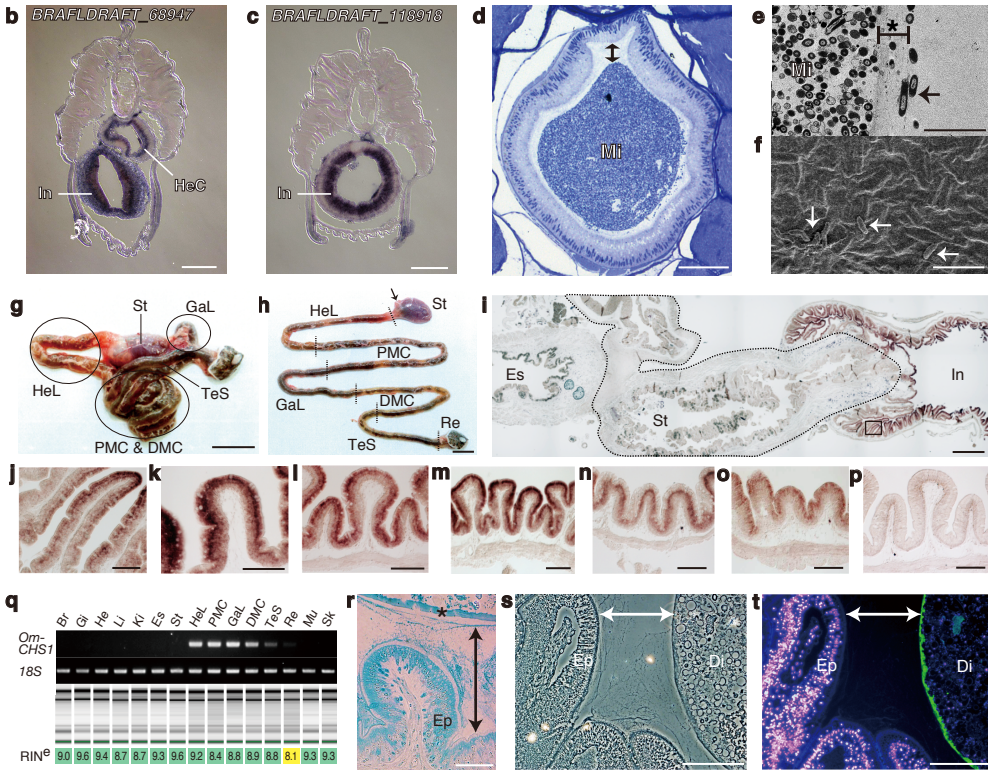



**Supplementary Figure 6. Intestinal chitin synthesis in the lancelet, *B. floridae*, and the ray-finned fish, *O. mossambicus*.** (a) Alignments of putative chitin synthases of *B. floridae*, BRAFLDRAFT\_68947 and BRAFLDRAFT\_118918, and of *O. mossambicus*, Om-CHS1. Cyan, yellow and magenta denotes transmembrane, chitin synthase and sterile\_alpha\_motif domains, respectively. Motif sequences of chitin synthases are typed in red. (b-c) *In situ* hybridized cross-sections of *B. floridae* showing chitin synthase expression in the hepatic cecum (HeC) and the intestine (In). (d) Toluidine blue-stained cross-section of *B. floridae* showing an axenic space (double-headed arrow) between the gut epithelium and the barrier membrane that encloses ingested microbes (Mi). Bacterial breaches are observed in the right half of the axenic space. (e) A TEM image of bacterial breach. An arrow indicates microbes outside a barrier membrane (\*). (f) An SEM image showing microbial attachments to the outer surface of the barrier membrane (arrows). (g-h) Gastrointestinal tract of *O. mossambicus* (g, coiled form; h, extended form). St, stomach; HeL, hepatic loop; PMC, proximal major coil; GaL, gastric loop; DMC, distal major coil; TeS, terminal segment; Re, rectum. An arrow denotes the cardia. (i) *In situ* hybridized sagittal section showing expression of *Om-CHS1* in the epithelium of intestine (In). Stomach is demarcated with dots. Es, esophagus. (j) Enlargement of the boxed area in i. (k-p) *In situ* hybridized cross-sections (k, HeL; l, PMC; m, GaL; n, DMC; o, TeS; p, PMC with sense probe). (q) RT-PCR of *Om-CHS1*. This composite figure shows the results of RT-PCR for *Om-CHS1* and *18S rRNA*, together with gel separation profiles and RIN<sup>e</sup> values of RNA samples. Br, brain; Gi, gill; He, heart; Li, liver; Ki, kidney; Mu, muscle; Sk, skin. (r) Alcian blue-stained cross-section of PMC. The villus epithelium (Ep) is covered with a mucus layer (double-headed arrow), as in DMC. Asterisk denotes a barrier membrane. (s-t) CBD&DAPI-stained cross-sections of PMC (s, Phase-contrast; t, fluorescent). A chitinous membrane (green) separates digesta microbes (blue) from the mucus layer (double-headed arrows), as in DMC. Di, digesta. Scale bars (b-d, j-p, r-t), 100  $\mu$ m; (e, f), 5  $\mu$ m; (g, h), 1 cm; and (i), 1 mm.

| Representative transcript ID | Product                                                   | Number of chitin-binding domain | Normalized protein score | Number of detected peptide |
|------------------------------|-----------------------------------------------------------|---------------------------------|--------------------------|----------------------------|
| KH.C1.45.v1.A.ND1-1          | Ci-MACPF1, membrane attack complex/perforin protein       |                                 | 221,999                  | 2,967                      |
| KH.C4.625.v1.A.ND1-1         | VCBP-C, variable-region containing chitin-binding protein | 1                               | 165,000                  | 2,297                      |
| KH.L108.38.v2.A.ND1-1        | Ci-GFM1, gel-forming mucin                                | 1                               | 161,356                  | 2,095                      |
| KH.L119.18.v1.A.ND1-1        | Ci-GH18, chitinase                                        | 2                               | 76,140                   | 1,221                      |
| KH.L141.55.v1.A.SL1-1        | Angiotensin-converting enzyme, metalloprotease            |                                 | 68,177                   | 947                        |
| KH.C12.673.v1.A.ND1-1        | Annexin                                                   |                                 | 65,741                   | 893                        |
| KH.C8.470.v3.A.ND1-1         | Serine protease inhibitor                                 |                                 | 50,104                   | 753                        |
| KH.C9.782.v1.A.ND1-1         | Ci-CLCA1, Ca-activated chloride channel                   | 2                               | 47,178                   | 686                        |
| KH.S425.9.v1.A.ND1-1         | Chymotrypsinogen B                                        |                                 | 42,512                   | 537                        |
| KH.L9.11.v1.C.SL1-1          | Catalase                                                  |                                 | 30,305                   | 368                        |
| KH.C4.259.v1.A.ND1-1         | HEXB beta-hexosaminidase subunit beta                     |                                 | 27,304                   | 376                        |
| KH.L157.5.v3.A.SL1-1         | Sodium/potassium-transporting ATPase subunit alpha-3      |                                 | 26,400                   | 341                        |
| KH.C4.761.v1.A.ND1-1         | Alcohol dehydrogenase                                     |                                 | 25,575                   | 364                        |
| KH.C8.123.v2.A.SL2-1         | Metalloprotease                                           |                                 | 24,227                   | 304                        |
| KH.C11.96.v2.A.SL1-1         | VCBP-B, VCBP                                              | 1                               | 23,936                   | 283                        |
| KH.C2.934.v1.A.SL1-1         | Cubilin                                                   |                                 | 23,900                   | 343                        |
| KH.C9.512.v3.A.SL1-1         | Villin                                                    |                                 | 22,432                   | 329                        |
| KH.C14.52.v1.A.nonSL3-1      | Ci-eEF1A4, transcription elongation factor                |                                 | 21,904                   | 328                        |
| KH.C1.321.v1.A.ND1-1         | Cubilin                                                   |                                 | 21,597                   | 304                        |
| KH.C3.903.v1.A.SL1-1         | Aldehyde dehydrogenase                                    |                                 | 20,854                   | 306                        |
| KH.C8.575.v1.A.SL1-1         | Metalloprotease                                           |                                 | 20,052                   | 277                        |
| KH.C6.206.v1.A.ND2-1         | Ci-FABP2, fatty acid-binding protein                      |                                 | 19,509                   | 268                        |
| KH.C5.45.v2.A.ND3-1          | Glutamate dehydrogenase                                   |                                 | 19,326                   | 281                        |
| KH.C1.742.v1.A.ND1-1         | MACPF protein                                             |                                 | 18,993                   | 264                        |
| KH.C12.207.v2.A.ND2-2        | Carboxypeptidase                                          |                                 | 18,821                   | 279                        |
| KH.C13.147.v1.A.ND1-1        | Aminopeptidase N                                          |                                 | 16,364                   | 234                        |
| KH.C1.1105.v1.A.ND1-1        | Cathepsin D                                               |                                 | 14,665                   | 196                        |
| KH.S425.11.v1.A.ND1-1        | Chymotrypsin-like protease                                |                                 | 13,863                   | 183                        |
| KH.C7.153.v1.A.ND1-1         | Ci-FABP6, fatty acid-binding protein                      |                                 | 13,729                   | 221                        |
| KH.S749.1.v2.A.SL1-1         | Glial fibrillary acidic protein                           |                                 | 13,721                   | 175                        |
| KH.C9.291.v1.A.ND1-1         | Ci-CLCA2, Ca-activated chloride channel                   | 2                               | 13,303                   | 183                        |
| KH.C9.821.v1.A.ND1-1         | Dipeptidyl peptidase                                      |                                 | 13,301                   | 196                        |
| KH.S1458.2.v1.A.ND1-1        | Serine protease                                           |                                 | 13,115                   | 221                        |
| KH.S425.12.v1.A.ND1-1        | Chymotrypsinogen                                          |                                 | 13,098                   | 186                        |
| KH.L97.10.v1.A.nonSL1-1      | Serine protease                                           |                                 | 12,890                   | 186                        |
| KH.C3.795.v1.A.ND1-1         | MACPF protein                                             |                                 | 12,851                   | 187                        |
| KH.S425.3.v1.A.SL1-1         | Chymotrypsinogen                                          |                                 | 12,485                   | 174                        |
| KH.L6.4.v1.A.ND1-1           | Peroxisomal multifunctional enzyme                        |                                 | 12,106                   | 162                        |
| KH.C8.679.v1.A.ND1-1         | Ci-contactin, contactin                                   |                                 | 11,665                   | 160                        |
| KH.C2.1070.v1.A.SL1-1        | Tolloid-like protein                                      |                                 | 11,365                   | 173                        |
| KH.L170.27.v2.A.ND1-1        | Maltase-glucoamylase                                      |                                 | 11,014                   | 168                        |
| KH.C12.644.v2.A.ND2-1        | Glutamyl aminopeptidase                                   |                                 | 10,951                   | 162                        |
| KH.C1.830.v1.A.ND1-1         | MACPF protein                                             |                                 | 10,605                   | 159                        |
| KH.C1.926.v1.A.ND1-1         | Hemicentin                                                | 3                               | 10,477                   | 163                        |
| KH.C10.93.v1.A.ND1-1         | Sodium/Hydrogen exchange regulatory cofactor              |                                 | 10,260                   | 132                        |
| KH.C12.92.v2.A.ND1-1         | Trans-1,2-dihydrobenzene-1,2-diol dehydrogenase           |                                 | 10,094                   | 143                        |
| KH.C7.83.v1.A.SL3-1          | Brevican core protein                                     |                                 | 8,970                    | 159                        |
| KH.C5.460.v1.A.SL1-1         | Brevican core protein                                     |                                 | 8,881                    | 137                        |
| KH.C2.187.v3.A.SL2-2         | 3'-phosphoadenosine 5'-phosphosulfate synthetase          |                                 | 8,590                    | 132                        |
| KH.C7.387.v1.A.ND1-1         | Carboxypeptidase                                          |                                 | 8,537                    | 127                        |

**Supplementary Table 1. Protein components of the surface matrix of chitinous barrier membrane of *C. intestinalis* Type A.** This table summarizes the results of LC-MS-MS proteomic analysis of *Ciona* barrier membranes. The list is sorted with normalized protein scores. Details of the top three proteins are shown in Figure 3 and Supplementary Figure 5. This list contains 4 MACPFs and 2 VCBPs.



| Bacterial division         | Order                 | Genus                    | Aquarium water |              | Food       |              | Stomach    |              | Hepatic loop |              | Distal major coil |              |
|----------------------------|-----------------------|--------------------------|----------------|--------------|------------|--------------|------------|--------------|--------------|--------------|-------------------|--------------|
|                            |                       |                          | Count          | (%)          | Count      | (%)          | Count      | (%)          | Count        | (%)          | Count             | (%)          |
| <b>Gammaproteobacteria</b> |                       |                          | <b>122</b>     | <b>100.0</b> | <b>472</b> | <b>93.5</b>  | <b>464</b> | <b>90.1</b>  | <b>316</b>   | <b>79.8</b>  | <b>108</b>        | <b>20.5</b>  |
|                            | Pseudomonadaceae      | <i>Pseudomonas</i>       | 116            | 95.1         | 433        | 85.7         | 430        | 83.5         | 286          | 72.2         | 91                | 17.3         |
|                            | Enterobacteriaceae    | <i>Serratia</i>          | 4              | 3.3          | 25         | 5.0          | 15         | 2.9          | 19           | 4.8          |                   |              |
|                            |                       | <i>Yersinia</i>          | 1              | 0.8          | 4          | 0.8          |            |              |              |              |                   |              |
|                            |                       | unknown                  |                |              | 7          | 1.4          | 12         | 2.3          | 4            | 1.0          | 3                 | 0.6          |
|                            |                       | <i>Rahnella</i>          |                |              |            |              | 4          | 0.8          |              |              |                   |              |
|                            |                       | <i>Plesiomonas</i>       |                |              |            |              | 1          | 0.2          | 7            | 1.8          | 9                 | 1.7          |
|                            | Xanthomonadaceae      | <i>Edwardsiella</i>      |                |              |            |              |            |              |              |              | 5                 | 1.0          |
|                            |                       | <i>Stenotrophomonas</i>  | 1              | 0.8          | 3          | 0.6          | 2          | 0.4          |              |              |                   |              |
| <b>Alphaproteobacteria</b> |                       |                          |                |              | <b>26</b>  | <b>5.1</b>   | <b>1</b>   | <b>0.2</b>   |              |              | <b>3</b>          | <b>0.6</b>   |
|                            | Acetobacteraceae      | <i>Acetobacter</i>       |                |              | 24         | 4.8          |            |              |              |              |                   |              |
|                            |                       | unknown                  |                |              | 2          | 0.4          |            |              |              |              | 2                 | 0.4          |
|                            | Caulobacteraceae      | <i>Caulobacter</i>       |                |              |            |              | 1          | 0.2          |              |              |                   |              |
|                            | Methylobacteriaceae   | <i>Methylobacterium</i>  |                |              |            |              |            |              |              |              | 1                 | 0.2          |
| <b>Betaproteobacteria</b>  |                       |                          |                |              | <b>3</b>   | <b>0.6</b>   | <b>4</b>   | <b>0.8</b>   | <b>1</b>     | <b>0.3</b>   | <b>22</b>         | <b>4.2</b>   |
|                            | Burkholderiaceae      | <i>Burkholderia</i>      |                |              | 3          | 0.6          |            |              |              |              |                   |              |
|                            | Comamonadaceae        | <i>Delftia</i>           |                |              |            |              | 4          | 0.8          |              |              | 1                 | 0.2          |
|                            | Chromobacteriaceae    | <i>Aquaspirillum</i>     |                |              |            |              |            |              |              |              | 1                 | 0.2          |
|                            |                       | unknown                  |                |              |            |              |            |              | 1            | 0.3          | 20                | 3.8          |
| <b>Actinobacteria</b>      |                       |                          |                |              | <b>2</b>   | <b>0.4</b>   |            |              |              |              |                   |              |
|                            | Propionibacteriaceae  | <i>Propionibacterium</i> |                |              | 2          | 0.4          |            |              |              |              |                   |              |
| <b>Sphingobacteria</b>     |                       |                          |                |              | <b>2</b>   | <b>0.4</b>   | <b>2</b>   | <b>0.4</b>   |              |              |                   |              |
|                            | Sphingobacteriaceae   | <i>Pedobacter</i>        |                |              | 2          | 0.4          | 2          | 0.4          |              |              |                   |              |
| <b>Fusobacteria</b>        |                       |                          |                |              |            |              | <b>32</b>  | <b>6.2</b>   | <b>79</b>    | <b>19.9</b>  | <b>325</b>        | <b>61.8</b>  |
|                            | Fusobacteriaceae      | <i>Cetobacterium</i>     |                |              |            |              | 32         | 6.2          | 79           | 19.9         | 325               | 61.8         |
| <b>Bacteroidetes</b>       |                       |                          |                |              |            |              | <b>12</b>  | <b>2.3</b>   |              |              | <b>39</b>         | <b>7.4</b>   |
|                            | Porphyromonadaceae    | unknown                  |                |              |            |              | 9          | 1.7          |              |              |                   |              |
|                            |                       | unknown                  |                |              |            |              | 3          | 0.6          |              |              | 36                | 6.8          |
|                            | Bacteroidaceae        | <i>Bacteroides</i>       |                |              |            |              |            |              |              |              | 3                 | 0.6          |
| <b>Verrucomicrobia</b>     |                       |                          |                |              |            |              |            |              |              |              | <b>27</b>         | <b>5.1</b>   |
|                            | Verrucomicrobiaceae   | <i>Akkermansia</i>       |                |              |            |              |            |              |              |              | 27                | 5.1          |
| <b>Clostridia</b>          |                       |                          |                |              |            |              |            |              |              |              | <b>1</b>          | <b>0.2</b>   |
|                            | Peptostreptococcaceae | <i>Peptoclostridium</i>  |                |              |            |              |            |              |              |              | 1                 | 0.2          |
| <b>Planctomycetes</b>      |                       |                          |                |              |            |              |            |              |              |              | <b>1</b>          | <b>0.2</b>   |
|                            | Planctomycetaceae     | <i>Singulisphaera</i>    |                |              |            |              |            |              |              |              | 1                 | 0.2          |
| <b>total</b>               |                       |                          | <b>122</b>     | <b>100.0</b> | <b>505</b> | <b>100.0</b> | <b>515</b> | <b>100.0</b> | <b>396</b>   | <b>100.0</b> | <b>526</b>        | <b>100.0</b> |

### Supplementary Table 2. Bacterial composition of the gut microbiota of *O. mossambicus*.

This table summarizes the results of a 16S rRNA gene analysis at the level of bacterial divisions, orders and genera. Items are sorted by dominance following the order of aquarium water, food, stomach, anterior intestine (hepatic loop) and posterior intestine (distal major coil). Coloring correspond to Figure 6c: White, gammaproteobacteria; gray, alphaproteobacteria; green, betaproteobacteria; red, fusobacteria; blue, bacteroidetes; and yellow, verrucomicrobia.

| Primer name                    | Sequence                             |
|--------------------------------|--------------------------------------|
| 16SrRNA_27f                    | agagtttgatcctggctcag                 |
| 16SrRNA_1491r                  | ggttaccttggtacgactt                  |
| 16SrRNA_907r                   | ccgtcaattcctttragttt                 |
| Chs_Sep02fw1                   | atgtatttcagtacagaaatg                |
| Chs_Sep02fw2                   | gatggatgcaaagcttacag                 |
| Chs_Sep02fw3                   | ctctactacctatgtgtgcc                 |
| Chs_Sep02rv3                   | ggcacacataggtagtagag                 |
| Chs_Sep02rv2                   | aagacgctgcaaaggg                     |
| Chs_Sep02rv1                   | cactggtgaaaacgcgtaag                 |
| Chs-v2_5R1                     | tgcccgccactgcaacctgcgtatc            |
| Chs-v2_5R2                     | ttccacaagcagctccaacatccggatt         |
| Chs-v2_3R1                     | agtcaggcaaaagcaagg                   |
| Chs-v2_3R2                     | ccgaatgtcgaaacgaagtc                 |
| Chs_3Race_Apr04                | atggggaccttccacaatggcaaa             |
| Chs_5Race_Apr04                | ccctggacaatcataacaacagttgcgg         |
| Chs5R_Sep14_01                 | acaacagttgcgggaccaag                 |
| Chs5R_Sep14_02                 | ctgtaagctttgcatccatc                 |
| Chs5R_Sep14_03                 | ccattgtggaaggtcccatc                 |
| Chs5Utr1_T2-1_R_392-412        | ccctaactccagagtcctatg                |
| Chs5Utr2_T2-1_R_411-431        | tggtgtacctggtcataagac                |
| Chs5Utr3_Kgr05.134.3.1_313-331 | agagtcctatggtgtacct                  |
| Chs5Utr4_Kgr05.134.3.1_407-426 | aactttagggtttgcctctgt                |
| Chs3Utr1_T2-2_gwR_326-345      | acgcataaatgacacctacc                 |
| Chs3Utr2_T2-2_gwR_344-364      | cctacattgatgtatgggctg                |
| Chs3Utr3_T2-2_gwR_435-455      | aagtgcgagtggttaagcaaag               |
| Macpfpf45_5Utr_f1              | gatattttgtgcattgtgttcctatagtgac      |
| Macpf45_5Utr_f2                | cctatagtgtaaaaaatgaagattcacacaac     |
| Macpf45_Atg_f1                 | atgaagattcacacaacagttactgctg         |
| Macpf45_Stp_r1                 | ttatgcatcacttctgtcacactggcttcc       |
| Macpf45_Stp_r2                 | agcagttgtaatctccatttggcatctt         |
| Macpf45_3Utr_r1                | gcatacataggatcatgtaattataacaattagttc |

|                  |                                                   |
|------------------|---------------------------------------------------|
| Macpf45_3Utr_r2  | gcgaaatttcataaaagcatacataggatcatg                 |
| Vcbp_ifv-pCold_f | gtaatctctgcttaaagcacagaatctaagatccctgccattg       |
| Vcbp_ifv-pCold_r | accgccacgaccttcaatgtgatggatggatggatgcactttatg     |
| Vcbp_ifi_22_f    | gaaggtcgtggcggtatcgtggaacaggaagtggatgttacctg      |
| Vcbp_ifi_349_r   | ttaagcagagattacttaattgttttcagggtaccacacgggtgccg   |
| Vcbp_ifi_278_f   | gaaggtcgtggcggtgaaatcatcagtgaaaacgatcgtaac        |
| Vcbp_ifi_280_r   | ttaagcagagattacttagatgattcaaccaccgtagattttgcatcgg |
| GfmM47_f1        | atgaagactcagtttgtcttcatgggatgc                    |
| GfmM47_f2        | gcttctatcacgcaaggtatcagtgaatcac                   |
| GfmM47_f3        | cactactgagtattcagcatcaatcaciaaagtc                |
| GfmG38_f1        | atggttcggttacaagattaactgtttatg                    |
| GfmG38_f2        | ccctaccattcatcaaacgtatgcagttac                    |
| GfmG37_f1        | atggtggcagcccgtgcgcaaatattgtctttg                 |
| GfmG37_f2        | ggagttgtacaaagtcagcgacaatcgtc                     |
| GfmG37_r1        | ttagttgatcaaatcattcatctctttggccaaatc              |
| GfmG37_r2        | cgcacaacgctctgtaagtcttcgggtgcatc                  |
| GfmG37_r3        | cggtgtcatcgaagtaagcaaagttgcagctgatg               |
| GfmG37_rCk1      | ttgtgggggttggtttactggtacagtgggtg                  |
| GfmG37_rCk2      | aggtagcgggtacaccacaagataaaacatcg                  |
| GfmG37_rCk3      | tcattgaaacaactctggtagccgtggaag                    |
| Gfm5Utr1f        | caatgtcacacgcaaatgtaactgc                         |
| Gfm5Utr2f        | atcagtggtgcaaaattatacgaagc                        |
| Gfm5REx1f        | atgaagactcagtttgtcttcatgg                         |
| Gfm5REx2f        | caaaatgaacaacggaacaagcg                           |
| Gfm5REx3f        | cctgactcactactgagtattcagcatc                      |
| Gfm5REx4f        | tcgaatgcacagagagctgtgg                            |
| Gfm5REx5f        | aatggaggttcgtgctcagc                              |
| Gfm5R-100r       | cgtttgatgaatgggttaggagcag                         |
| Gfm3Race100f     | ccctgcactacatgtacgtgcc                            |
| Gfm3Race250f     | ccatcttgcgagtttgtaaaac                            |
| Gfm3Race300f     | gaacacctcgttcaaccgacg                             |
| Gfm3Race400f     | gtacattcccgtccaaaccaatc                           |
| Gfm3Race_Tm65    | aagcagtggtatcaacgcagag                            |



## Supplementary References

1. Riisgård, H. U. & Larsen, P. S. Particle capture mechanisms in suspension-feeding invertebrates. *Mar. Ecol. Prog. Ser.* **418**, 255–293 (2010).
2. Simakov et al. Hemichordate genomes and deuterostome origins. *Nature* **527**, 459–465 (2015).
3. Benito, J. & Pardos, F. in *Microscopic Anatomy of Invertebrates. Volume 15. Hemicordata, Chaetognatha, and the Invertebrate Chordates* (eds Harrison, F. W. & Ruppert, E. E.) 15–101 (Wiley-Liss, New York, 1997).
4. Bone, Q., Carré, C. & Chang, P. Tunicate feeding filters. *J. Mar. Biol. Assoc. U. K.* **83**, 907–919 (2003).
5. Petersen, J. K. Ascidian suspension feeding. *J. Exp. Mar. Biol. Ecol.* **342**, 127–137 (2007).
6. Mallatt, J. The suspension feeding mechanism of the larval lamprey *Petromyzon marinus*. *J. Zool.* **194**, 103–142 (1981).
7. Martini, F. H. in *The Biology of Hagfishes* (eds Jørgensen, J. M., Lomholt, J. P., Weber, R. E. & Malte, H.) 57–77 (Chapman & Hall, London, 1998).
8. Yalden, D. W. Feeding mechanisms as evidence for cyclostome monophyly. *Zool. J. Linn. Soc.* **84**, 291–300 (1985).
9. Goudemand, N., Orchard, M. J., Urdy, S., Bucher, H. & Tafforeau, P. Synchrotron-aided reconstruction of the conodont feeding apparatus and implications for the mouth of the first vertebrates. *Proc. Natl. Acad. Sci. U.S.A.* **108**, 8720–8724 (2011).
10. Stevens, C. E. & Hume, I. D. *Comparative Physiology of the Vertebrate Digestive System* (Cambridge University Press, Cambridge, 1995).
11. Holley, M. C. Cell shape, spatial patterns of cilia, and mucus-net construction in the ascidian endostyle. *Tissue Cell* **18**, 667–684 (1986).
12. Nielsen, S. E., Bone, Q., Bond, P. & Harper, G. On particle filtration by amphioxus (*Branchiostoma lanceolatum*). *J. Mar. Biol. Assoc. U. K.* **87**, 983–989 (2007).
13. Oku, T. & Ishikawa, K. Analysis of the hyperthermophilic chitinase from *Pyrococcus furiosus*: Activity toward crystalline chitin. *Biosci. Biotechnol. Biochem.* **70**, 1696–1701 (2006).
14. Rosado, C. J. et al. The MACPF/CDC family of pore-forming toxins. *Cell. Microbiol.* **10**, 1765–1774 (2008).
15. Tan, K. et al. Crystal structure of the TSP-1 type 1 repeats: a novel layered fold and its biological implication. *J. Cell Biol.* **159**, 373–382 (2002).
